# Supplementary material for: Balance between carbon gain and loss under long-term drought: impacts on foliar respiration and photosynthesis in Quercus ilex L
Source: PubMed Central journal article supplement (PMC4737074; doi:10.1093/jxb/erv492), 2015-11-09
Supplement: supp_erv492_supplementary_figures_S1_S4_tables_S1_S4.pdf [file supp_erv492_supplementary_figures_S1_S4_tables_S1_S4.pdf]

**Balance between carbon gain and loss under long-term drought: impacts on foliar respiration and photosynthesis in *Quercus ilex* L.**

Authors: D. Sperlich, A. Barbeta, R. Ogaya, S. Sabaté, J. Peñuelas

**Supplementary Data**

**Supplementary Figures**

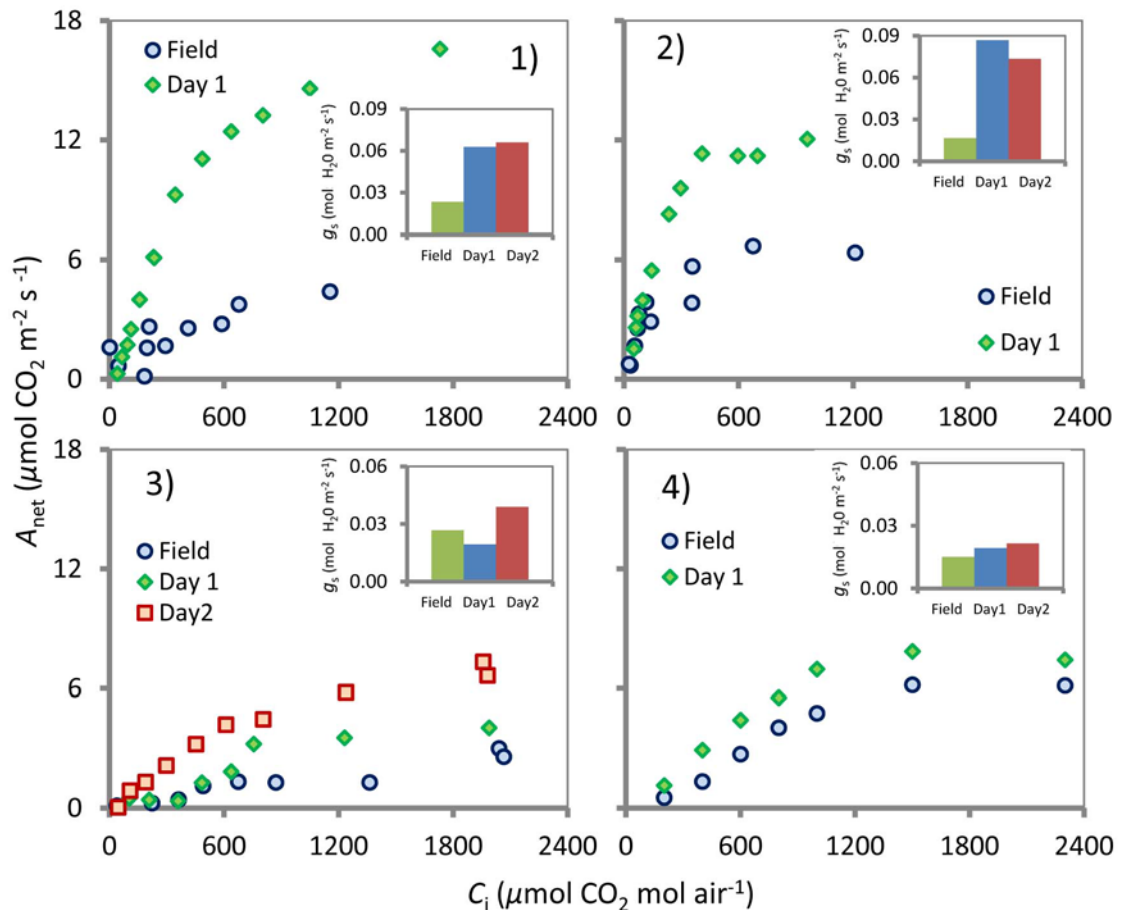

**Supplementary Fig S1:** Four exemplary samples of carbon-response curves conducted at leaves of i) twigs attached to the tree (Field), ii) after cutting and pre-conditioning the twigs under dim light in water in the lab for one night (Day 1) and iii) two nights (Day 2). Embedded bar charts show the evolution of stomatal conductance ( $g_s$  in  $\text{mol H}_2\text{O m}^{-2} \text{ s}^{-1}$ ) directly after cutting in the field, and after pre-conditioning at Day1 and Day2.

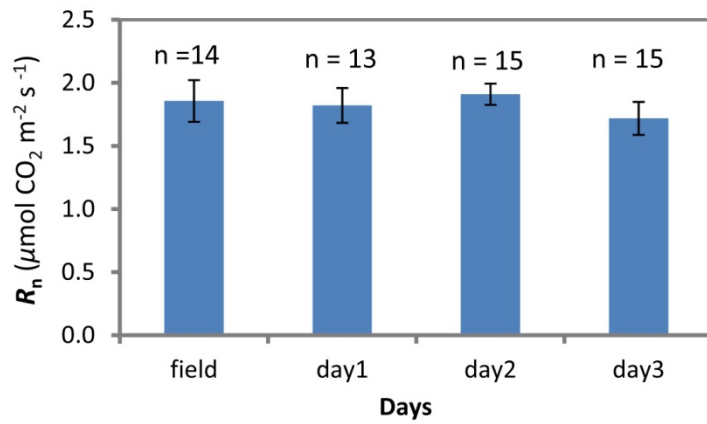

**Supplementary Fig. S2:** Bar chart depicting the evolution of night respiration ( $R_n$ ) of a dark adapted leaf of *Q. ilex* after cutting in the field,ii) and at day one, two and three after being pre-conditioned under dim light in water in the lab. Vertical bars indicate standard errors of the means (n=13-15). No significant differences ( $P < 0.05$ ) were found.

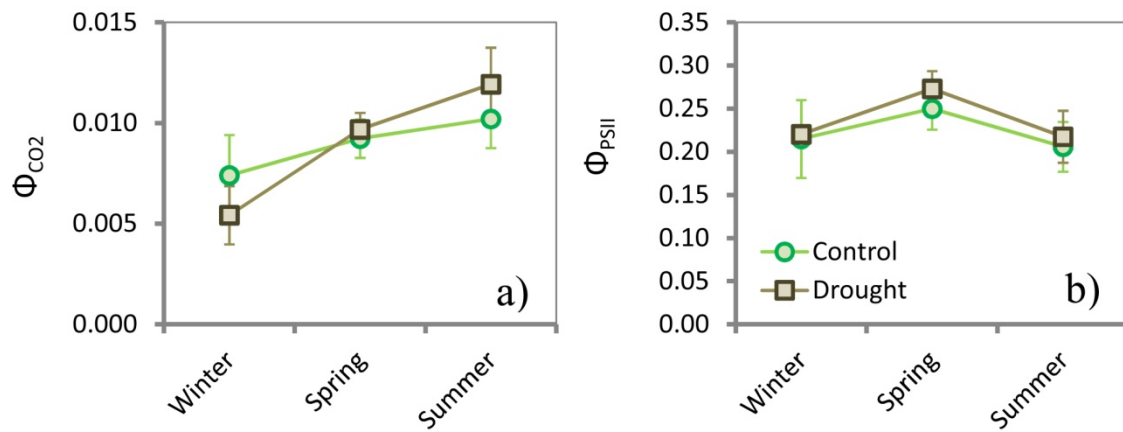

**Supplementary Fig. S3:** Line graphs depicting seasonal changes of a) quantum yield of CO<sub>2</sub> ( $\Phi_{CO_2}$ ) and b) effective quantum yield of PSII ( $\Phi_{PSII}$ ) for *Q. ilex*. Seasonal campaigns were conducted in winter, spring, and summer 2013. Vertical bars indicate standard errors of the means (n = 59).

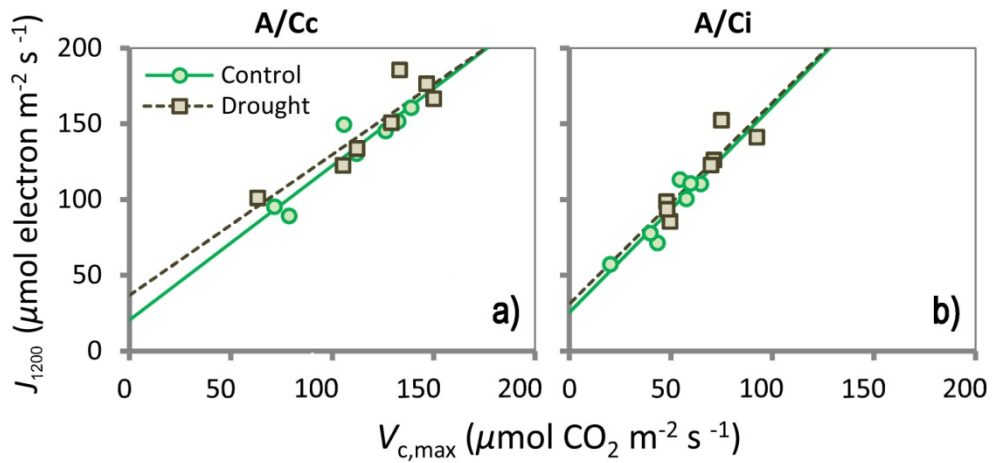

**Supplementary Fig S4:** Scatter plots and regression lines of maximum carboxylation rate ( $V_{c,max}$ ) versus of electron-transport rate at saturating light and  $CO_2$  ( $J_{1200}$ ) derived from a)  $A/C_c$  and b)  $A/C_i$  response curves for control and drought plots in summer 2013. Only the regression lines for significant relationships ( $P < 0.05$ ) are displayed.

## Supplementary Tables

**Supplementary Table S1.** Regression equations and coefficients of determination ( $R^2$ ) for  $A_{\text{net}}/R_d$  for *Q. ilex* in three sampling campaigns in the control and drought plots. The  $P$ -values indicate the significance of the differences between the slopes for the control and drought plots. Equations for non-significant relationships are not displayed.

| Campaign    | Plot    | Equation             | $R^2$ | $P$   |
|-------------|---------|----------------------|-------|-------|
| Total       | control | $y = -0.98x + 10.41$ | -0.04 | 0.513 |
|             | drought | $y = 1.61x + 8.10$   | -0.03 |       |
| Winter 2013 | control | $y = 3.54x + 2.6$    | -0.04 | 0.400 |
|             | drought | $y = 3.26x - 0.25$   | 0.17  |       |
| Spring 2013 | control | $y = -2.37x + 11.10$ | -0.02 | 0.305 |
|             | drought | $y = 0.89x + 8.4$    | -0.14 |       |
| Summer 2013 | control | $y = -2.81x + 14.18$ | -0.04 | 0.357 |
|             | drought | $y = 6.61x + 6.02$   | 0.65  |       |

**Supplementary Table S2.** Regression equations and coefficients of determination ( $R^2$ ) for  $A_{\text{net}}/R_n$  for *Q. ilex* in three sampling campaigns in control and drought plots. The  $P$ -values indicate the significance of the differences between the slopes for the control and drought plots. Equations for non-significant relationships are not displayed.

| Campaign    | Plot    | Equation             | $R^2$ | $P$   |
|-------------|---------|----------------------|-------|-------|
| Total       | control | $y = -1.46x + 11.69$ | 0.02  | 0.129 |
|             | drought | $y = 2.88x + 5.47$   | 0.01  |       |
| Winter 2013 | control | $y = 22.2x - 33.4$   | 0.45  | 0.427 |
|             | drought | $y = 2.91x - 0.62$   | -0.13 |       |
| Spring 2013 | control | $y = -1.63x + 11.13$ | 0.02  | 0.405 |
|             | drought | $y = 1.43x + 7.39$   | 0.02  |       |
| Summer 2013 | control | $y = -1.75x + 13.64$ | -0.04 | 0.205 |
|             | drought | $y = 7.96x + 3.55$   | 0.20  |       |

**Supplementary Table S3.** Regression equations and coefficients of determination ( $R^2$ ) for  $J_{\text{amb}}/A_{\text{net}}$  for *Q. ilex* in three sampling campaigns in control and drought plots. The  $P$ -values indicate the significance of the differences between the slopes for the control and drought plots. Equations for non-significant relationships are not displayed.

| Campaign    | Leaf position | Equation            | $R^2$ | $P$   |
|-------------|---------------|---------------------|-------|-------|
| Total       | control       | $y = 4.64x + 87.2$  | 0.29  | 0.711 |
|             | drought       | $y = 3.88x + 103.6$ | 0.34  |       |
| Winter 2013 | control       | $y = 6.61x + 76.5$  | 0.27  | 0.738 |
|             | drought       | $y = 8.64x + 85.5$  | 0.68  |       |
| Spring 2013 | control       | $y = 8.34x + 63.8$  | 0.59  | 0.538 |
|             | drought       | $y = 12.2x + 39.2$  | 0.67  |       |
| Summer 2013 | control       | $y = 4.61x + 78.8$  | 0.16  | 0.543 |
|             | drought       | $y = 8.12x + 31.2$  | 0.43  |       |

**Supplementary Table S4.** Regression equations and coefficients of determination ( $R^2$ ) for  $C_s/C_i$  for *Q. ilex* in three sampling campaigns in control and drought plots. The  $P$ -values indicate the significance of the differences between the slopes for the control and drought plots. Equations for non-significant relationships are not displayed.

| Campaign    | Leaf position | Equation             | $R^2$ | $P$   |
|-------------|---------------|----------------------|-------|-------|
| Total       | control       | $y = 0.18x + 52.9$   | 0.10  | 0.381 |
|             | drought       | $y = 0.011x + 81.8$  | -0.10 |       |
| Winter 2013 | control       | $y = 0.171x + 39.0$  | -0.06 | 0.435 |
|             | drought       | $y = -0.02x + 57.2$  | -0.48 |       |
| Spring 2013 | control       | $y = 0.053x + 63.8$  | -0.14 | 0.553 |
|             | drought       | $y = 0.12x + 48.3$   | 0.74  |       |
| Summer 2013 | control       | $y = 0.17x + 69.2$   | 0.05  | 0.499 |
|             | drought       | $y = -1.09x + 344.4$ | -0.15 |       |
